# Supplementary material
Source: publisher figshare collection journal article supplement (https://acs.figshare.com/ndownloader/files/5684223)
Supplement: Supplementary file 1 [file 5684223]

# Material for Electronic Supplement

## **Derivation of the tissue-gas-film 3 phase resistance model to describe the relationship between thin-film equilibration times and $K_{OA}$**

In this model, the total resistance ( $R_{TOTAL}$ ) that a chemical substance encounters when diffusing from the sample matrix into the thin film can be represented by the  $t_{95}$ . The total resistance can be viewed as the sum of the resistances for mass transport of the chemical in the biological tissue ( $R_T$ ), the gas-phase ( $R_G$ ) and the thin film ( $R_F$ ):

$$R_{TOTAL} = R_T + R_G + R_F \quad (5)$$

Following the fugacity approach,  $R_{TOTAL}$  can be represented by the reciprocal of the chemical conductivity, expressed by the film-to-tissue transport parameter  $D_{FT}$  ( $\text{mol.Pa}^{-1}.\text{hr}^{-1}$ ).  $D_{FT}$  is related to the chemical transport parameters in the biological tissue ( $D_T$ ), the gas-phase ( $D_G$ ) and the thin film ( $D_F$ ):

$$1/D_{FT} = 1/D_F + 1/D_G + 1/D_T \quad (6)$$

Chemical transport in the biological tissue and the film is mainly through diffusion. As a result  $D_F$  and  $D_G$  can be expressed as:

$$D_F = K_F \cdot A_F \cdot Z_F \text{ and } D_T = K_T \cdot A_T \cdot Z_T \quad (7)$$

1

2 Where  $\kappa_F$  and  $\kappa_T$  are the mass transfer coefficients (m/hr) for diffusion in the film and tissue  
 3 respectively;  $A_F$  and  $A_T$  are the areas of diffusion ( $m^2$ ) and  $Z_F$  and  $Z_T$  are the fugacity  
 4 capacities ( $mol.m^{-3}.Pa^{-1}$ ) of the film and tissue for the chemical.

5 Chemical transport in the gas phase is through a combination of diffusion and flow generated  
 6 by rotating the vials.  $D_G$  can be expressed as:

7

$$8 \quad D_G = Q_G.Z_G \quad (8)$$

9

10 Where  $Q_G$  is a hypothetical flow rate ( $m^3/hr$ ), representing diffusion and gas circulation in the  
 11 vial. Substitution of equation 7 and 8 in equation 6, gives:

12

$$13 \quad 1/D_{FT} = (1/\kappa_F.A_F.Z_F) + (1/Q_G.Z_G) + (1/\kappa_T.A_T.Z_T) \quad (9)$$

14

15 The equilibration time  $t_{95}$  can be expressed as :

16

$$17 \quad t_{95} = 3/k_{FT} \quad (10)$$

18

19 where  $k_{FT}$  is the rate constant ( $hr^{-1}$ ) for film-to-tissue transfer. Following the fugacity approach,

20  $k_{FT}$  can be represented by:

21

$$22 \quad k_{FT} = D_{FT}/(V_F.Z_F) \quad (11)$$

23

1 where  $D_{FT}$  is the transport parameter ( $\text{mol.Pa}^{-1}.\text{hr}^{-1}$ ) for film-to-tissue transfer. Combining  
 2 equations 9, 10 and 11, results in:

$$3 \quad t_{95} = 3. (V_F.Z_F) / D_{FT} = 3. (V_F.Z_F) \cdot \{ (1/K_F.A_F.Z_F) + (1/Q_G.Z_G) + (1/K_T.A_T.Z_T) \} \quad (12)$$

5  
 6 which can be simplified to:

$$7 \quad t_{95} = 3. (V_F.Z_F) / D_{FT} = 3 \cdot \{ (d_F/K_F) + (V_F.K_{FG}/Q_G) + (V_F.K_{FT}/K_T.A_T) \} \quad (13)$$

9  
 10 where  $d_F$  is the thickness of the film,  $K_{FG}$  is the film to gas phase partition coefficient ( $Z_F/Z_G$ )  
 11 and  $K_{FT}$  is the film to tissue partition coefficient ( $Z_F/Z_T$ ). Equation 13 illustrates that since  $K_{FG}$  is  
 12 correlated to  $K_{OA}$  and  $K_{OA}$  varies from  $10^{6.3}$  to  $10^{9.2}$  for the test chemicals in this study, the gas-  
 13 phase resistance ( $V_F.K_{FG}/Q_G$ ) can be expected to increase substantially relative to film and  
 14 tissue phase resistance.  $K_{FT}$  representing the film/tissue partition coefficient is not expected to  
 15 vary substantially among the test chemicals. An increase in film thickness is expected to result  
 16 in a proportional increase in the overall resistance and hence in the value of  $t_{95}$ .
